# Supplementary material
Source: publisher site journal article supplement (https://www.dovepress.com/article/289748)
Supplement: Supplementary file 1 [file get_supplementary_file.php]

## SUPPLEMENTARY FILE A1

### LEGEND OF VARIABLES

| <b>Variable</b>                   | <b>Definition</b>                                                                                                                                                                                                              |
|-----------------------------------|--------------------------------------------------------------------------------------------------------------------------------------------------------------------------------------------------------------------------------|
| Electrolyte (hypo = 1, hyper = 2) |                                                                                                                                                                                                                                |
| Ca                                | Calcium                                                                                                                                                                                                                        |
| Mg                                | Magnesium                                                                                                                                                                                                                      |
| PO                                | Phosphorus                                                                                                                                                                                                                     |
| Comorbidities                     |                                                                                                                                                                                                                                |
| sexe                              | Sex (female = 1, male = 0)                                                                                                                                                                                                     |
| c_CAD                             | Coronary artery disease                                                                                                                                                                                                        |
| c_HF                              | Heart failure                                                                                                                                                                                                                  |
| c_PAD                             | Peripheral artery disease                                                                                                                                                                                                      |
| c_stroke                          | Stroke or TIA                                                                                                                                                                                                                  |
| c_DEM                             | Major neurocognitive disorder                                                                                                                                                                                                  |
| c_COPD                            | Chronic obstructive pulmonary disease                                                                                                                                                                                          |
| c_Rhum                            | Rheumatismal disease (e.g., rheumatoid arthritis, polymyalgia rheumatica) or connective tissue disorder (e.g., Lupus, Sjogren syndrome, erythrodermia, other connectivitis)                                                    |
| c_ULCUS                           | Peptic ulcer disease                                                                                                                                                                                                           |
| c_HEPmild                         | Mild hepatic disease (includes chronic hepatitis)                                                                                                                                                                              |
| c_HEPsev                          | Moderate or severe hepatic disease (includes portal hypertension)                                                                                                                                                              |
| c_Db                              | Diabetes type 1 or 2                                                                                                                                                                                                           |
| c_PLEGIA                          | Hemiplegia, paraplegia                                                                                                                                                                                                         |
| c_HIV                             | HIV, AIDS                                                                                                                                                                                                                      |
| c_NEO                             | Neoplasia                                                                                                                                                                                                                      |
| c_MET                             | Solid metastatic tumor                                                                                                                                                                                                         |
| c_ENDO                            | Endocrinian disease: (e.g., Hypo/ hyperthyroidia, hypo/hyperparathyroidia, adrenal insufficiency, Cushing disease, Addison disease, multiple endocrinian neoplasias (MEN), pheochromocytoma)<br>Diabetes mellitus not included |
| c_GRANUL                          | Granulomatous disease (e.g., Tuberculosis, histoplasmosis, sarcoidosis, berylliosis, coccidioidomycosis)                                                                                                                       |
| c_MALNUT                          | Chronic malnutrition, malabsorption syndrome                                                                                                                                                                                   |
| C_CONSTIP                         | Chronic constipation                                                                                                                                                                                                           |
| CKD                               | Chronic kidney disease/chronic kidney injury                                                                                                                                                                                   |
| Medication                        |                                                                                                                                                                                                                                |
| rx1_furosem                       | Furosemide                                                                                                                                                                                                                     |
| rx2_thiazid                       | Thiazid diuretic                                                                                                                                                                                                               |

|                    |                                                                                                               |
|--------------------|---------------------------------------------------------------------------------------------------------------|
| rx3_otherdiur      | Other diuretics: potassium sparing (e.g., spironolactone, eplerone, amiloride, triamterene) and acetazolamide |
| rx4_digoxin        | Digoxin (lanoxin)                                                                                             |
| rx5_PPI            | Proton pump inhibitor                                                                                         |
| rx6_antiH          | Antiacids (tums, maalox, diovol)                                                                              |
| rx7_lithium        | Lithium                                                                                                       |
| rx8_anticonv       | Anticonvulsivant (lyrica, gabapentin, benzodiazepines not included)                                           |
| rx9_osteoptx       | Antiosteoporotic tx (Biphosphonates, synthetic PTH (Forteo), Denosumab (prolia), calcitonin)                  |
| rx10_calcium       | Calcium                                                                                                       |
| rx11_oothermineral | Other mineral supplements                                                                                     |
| rx12_vitD          | Vitamin D                                                                                                     |
| rx13_oothervit     | Other vitamin supplement                                                                                      |
| rx14_laxative      | Laxatifs (Lax-a-day, relaxa, etc.) (excludes colace and sennokot)                                             |
| rx15_chimio        | Antineoplastic treatment (e.g., chemotherapy, plaquenil, letrozole)                                           |
| rx16_immunomod     | Immunomodulators and anti-reject treatment (e.g., cyclosporine, tacrolimus, sirolimus)                        |
| rx17_corticoid     | Corticosteroid (> 30 days/year or in past 15 days)                                                            |
| rx18_theophyl      | Theophyllin                                                                                                   |
| rx19_phosbind      | Phosphate-binders (Renvela)                                                                                   |
| rx20_calcimim      | Calcimimétiques (Sensipar)                                                                                    |
| roh                | Known alcoholism or 3 or more drinks/day                                                                      |

## Signs and symptoms

### Neurological

|                          |                                                                                       |
|--------------------------|---------------------------------------------------------------------------------------|
| seizure                  | Seizure (on history or on presentation)                                               |
| weakness                 | Weakness (focal or generalized)                                                       |
| paresthesias             | Paresthesias                                                                          |
| tremor                   | Tremor or parkinsonism (pill rolling)                                                 |
| altered_mental_status    | Altered mental status (coma, confusion, disorientation, excessive somnolence, GCS<15) |
| headache                 | Headache                                                                              |
| gait_disturbance         | Gait disturbance (Ataxia, limping, cerebellar signs)                                  |
| memory_loss              | Mnesic symptom                                                                        |
| tetany                   | Tetany, trismus                                                                       |
| hypotonia                | Hypotonia                                                                             |
| osteotendinousreflex_dc  | Diminution of osteotendinous reflexes (1+ and less on 4)                              |
| osteotendinousreflex_inc | Increase of osteotendinous reflexes (2+ and more on 4)                                |
| chvostek                 | Chvostek sign                                                                         |
| trousseau                | Trousseau sign                                                                        |

### Gastrointestinal

|                |                                    |
|----------------|------------------------------------|
| abdominal_pain | Abdominal pain                     |
| nauseas        | Nauseas or vomiting                |
| anorexia       | Anorexia or diminution of appetite |
| constipation   | Constipation                       |
| dysphagia      | Dysphagia                          |
| ileus          | Ileus or loss of peristaltism      |

#### Cardiovasculaire

|                           |                                                                                                                         |
|---------------------------|-------------------------------------------------------------------------------------------------------------------------|
| palpitations              | Palpitations or arrhythmias                                                                                             |
| syncope                   | Syncope or presyncope                                                                                                   |
| poor_peripheral_perfusion | Poor peripheral perfusion (e.g., capillary refill > 2 seconds, cutaneous fold, dry mucosis)                             |
| HF                        | Heart failure signs (e.g., Jugular distension, positive hepatojugular reflux, crepitus on auscultation, leg swelling)   |
| Inc_WOB                   | Increased work of breathing (dyspnea, accessory muscle use, respiratory noises, tachypnea, cyanosis) or O2 requirements |

#### Musculoskeletal

|                |                                                           |
|----------------|-----------------------------------------------------------|
| msk_painNS     | Non specific musculoskeletal pain, muscle cramp or spasms |
| bone_pain      | Bone pain                                                 |
| osseous_deform | Osseous deformation                                       |
| fracture       | Fracture                                                  |

#### Nephrologic

|            |            |
|------------|------------|
| polyuria   | Polyuria   |
| nycturia   | Nycturia   |
| polydipsia | Polydipsia |

#### Miscellaneous

|                     |                               |
|---------------------|-------------------------------|
| weight_loss         | Weight loss                   |
| blurry_vision       | Blurry vision                 |
| depression          | Depressive symptoms           |
| cutaneous_xerosis   | Cutaneous xerosis             |
| pigmentation_change | Hyperpigmentation of the skin |

#### Clinical

|      |                                    |
|------|------------------------------------|
| hc1  | heart rate at triage               |
| sbp1 | systolic blood pressure at triage  |
| dpb1 | diastolic blood pressure at triage |

#### Paraclinical

|     |                             |
|-----|-----------------------------|
| ca1 | Initial calcium serum level |
|-----|-----------------------------|

|       |                                |
|-------|--------------------------------|
| mg1   | Initial magnesium serum level  |
| po1   | Initial phosphorus serum level |
| creat | Creatinin                      |
| gluco | Blood glucose level            |
| Na    | Sodium                         |
| K     | Potassium                      |
| Cl    | Chlorus                        |
| albu  | Albumin                        |
| pH    | blood pH                       |
| HCO3- | Bicarbonates level             |
| TSH   | TSH                            |

#### ECG

|       |                                                |
|-------|------------------------------------------------|
| ecg   | Sinus rythm                                    |
| ecg2  | Sinus bradycardia                              |
| ecg3  | Sinus tachycardia                              |
| ecg4  | Small QRS tachycardia (< 120 ms)               |
| ecg5  | Large QRS tachycardia (> 120 ms)               |
| ecg6  | First degree AV block                          |
| ecg7  | 2nd or 3rd degree AV block                     |
| ecg8  | Large QRS( > 120 ms)                           |
| ecg9  | Long PR (> 200 ms)                             |
| ecg10 | Long QTc( > 440 ms in men, > 460 ms in women)  |
| ecg11 | Short QTc (< 360 ms in men, < 370 ms in women) |
| ecg12 | Diffuse ST segment elevation                   |
| ecg13 | Pacemaker rythm                                |

#### Treatment

tx

- 0 No intervention
- 1 Therapeutic intervention by ED physician in the ED (including referral to family physician or specialist)
- 2 Therapeutic intervention by a consulting physician while in the ED or within 24 hours of hospitalisation

SUPPLEMENTARY FILE A2

REFERENCE RANGE FOR ELECTROLYTE SERUM LEVEL TESTING

| <b>Electrolyte</b> | <b>Reference range<br/>(<math>\mu\text{mol/L}</math>)</b> |
|--------------------|-----------------------------------------------------------|
| <b>Calcium</b>     | 2,15 – 2,60                                               |
| <b>Magnesium</b>   | 0,70 – 0,98                                               |
| <b>Phosphorus</b>  | 0,80 – 1,45                                               |

SUPPLEMENTARY FILE A3  
LOGISTIC REGRESSION MODELS FOR RISK FACTORS OF ELECTROLYTE  
ABNORMALITY

**Final stepwise logistic model – Hypocalcemia**

Factors entered in model: ROH, CKD, c\_COPD, c\_Db, c\_PAD, c\_Neo, c\_Endo, rx1\_furosem, rx3\_otherdiur, rx5\_PPI, rx11\_othermineral, rx15\_chimio, rx17\_corticoid, rx19\_phosbind, Seizure, Abdominal\_pain, poor\_peripheral\_perfusion, inc\_WOB, HF, PO, Mg, Sex, ecg10, Age\_yr

| Response Profile |    |                 |
|------------------|----|-----------------|
| Ordered value    | ca | Total frequency |
| 1                | 1  | 128             |
| 2                | 0  | 715             |

*Probability modeled is ca='1'.*

| Type 3 Analysis of Effects |    |                 |            |
|----------------------------|----|-----------------|------------|
| Effect                     | DF | Wald Chi-Square | Pr > ChiSq |
| ROH                        | 1  | 5.7926          | 0.0161     |
| CKD                        | 1  | 8.4414          | 0.0037     |
| Abdominal_pain             | 1  | 7.4045          | 0.0065     |
| po                         | 2  | 14.3403         | 0.0008     |
| mg                         | 2  | 22.1457         | <.0001     |
| rx15_chimio                | 1  | 7.8776          | 0.0050     |
| rx3_otherdiur              | 1  | 5.8485          | 0.0156     |
| inc_WOB                    | 1  | 11.1945         | 0.0008     |
| ECG10_NEW                  | 2  | 11.1105         | 0.0039     |

| Odds Ratio Estimates   |                |                           |       |
|------------------------|----------------|---------------------------|-------|
| Effect                 | Point Estimate | 95% Wald Confidence Limit |       |
| ROH 1 vs 0             | 1.964          | 1.134                     | 3.404 |
| CKD 1 vs 0             | 1.972          | 1.247                     | 3.117 |
| Abdominal_pain 1 vs 0  | 1.940          | 1.204                     | 3.126 |
| po 1 vs 0              | 1.887          | 1.075                     | 3.311 |
| po 2 vs 0              | 3.003          | 1.598                     | 5.644 |
| mg 1 vs 0              | 2.627          | 1.636                     | 4.217 |
| mg 2 vs 0              | 0.271          | 0.083                     | 0.887 |
| rx15_chimio 1 vs 0     | 2.293          | 1.284                     | 4.092 |
| rx3_otherdiur 1 vs 0   | 3.243          | 1.250                     | 8.414 |
| inc_WOB 1 vs 0         | 3.316          | 1.643                     | 6.692 |
| ECG10_NEW 1 vs 0       | 2.021          | 1.249                     | 3.268 |
| ECG10_NEW UNKNOWN vs 0 | 0.903          | 0.532                     | 1.532 |

## Final stepwise logistic model – Hypercalcemia

Factors entered in model: c\_NEO, c\_MET, c\_ENDO, rx1\_furosem, rx12\_vitD, rx13\_othervit, rx16\_immunomod, Hallucinations, Altered\_mental\_status, weight\_loss, bone\_pain, Mg, PO, sex, Age\_yr

| Response Profile |    |                 |
|------------------|----|-----------------|
| Ordered value    | ca | Total frequency |
| 1                | 2  | 35              |
| 2                | 0  | 763             |

*Probability modeled is ca='2'.*

| Type 3 Analysis of Effects |    |                 |            |
|----------------------------|----|-----------------|------------|
| Effect                     | DF | Wald Chi-Square | Pr > ChiSq |
| Hallucinations             | 1  | 4.8770          | 0.0272     |
| po                         | 2  | 10.2379         | 0.0060     |
| rx1_furosem                | 1  | 4.6418          | 0.0312     |
| rx12_vitD                  | 1  | 13.8420         | 0.0002     |
| bone_pain                  | 1  | 11.1254         | 0.0009     |

| Odds Ratio Estimates  |                |                           |        |
|-----------------------|----------------|---------------------------|--------|
| Effect                | Point Estimate | 95% Wald Confidence Limit |        |
| Hallucinations 1 vs 0 | 3.907          | 1.166                     | 13.092 |
| po 1 vs 0             | 1.625          | 0.570                     | 4.638  |
| po 2 vs 0             | 4.566          | 1.791                     | 11.638 |
| rx1_furosem 1 vs 0    | 0.107          | 0.014                     | 0.818  |
| rx12_vitD 1 vs 0      | 4.101          | 1.950                     | 8.627  |
| bone_pain 1 vs 0      | 5.681          | 2.047                     | 15.767 |

## Final stepwise logistic model – Hypomagnesemia

Factors entered in model: c\_COPD, c\_DB, c\_NEO, c\_ENDO, c\_RHUM, c\_MET, rx5\_PPI, rx10\_calcium, rx11\_othermineral, rx12\_vitD, rx13\_othervit, rx14\_laxative, rx15\_chimio, rx16\_immunomod, rx17\_corticoid, poor\_peripheral\_perfusion, CKD, Seizure, Paresthesias, Nauseas, Ca, PO, Sex, Age\_yr

| Response Profile |    |                 |
|------------------|----|-----------------|
| Ordered Value    | mg | Total frequency |
| 1                | 1  | 155             |
| 2                | 0  | 725             |

*Probability modeled is mg='1'.*

| Type 3 Analysis of Effects |    |                 |            |
|----------------------------|----|-----------------|------------|
| Effect                     | DF | Wald Chi-Square | Pr > ChiSq |
| Nauseas                    | 1  | 7.2419          | 0.0071     |
| ca                         | 2  | 13.7765         | 0.0010     |
| po                         | 2  | 6.5710          | 0.0374     |
| c_DB                       | 1  | 25.0577         | <.0001     |
| rx10_calcium               | 1  | 6.3932          | 0.0115     |
| rx17_corticoid             | 1  | 8.6505          | 0.0033     |

| Odds Ratio Estimates  |                |                           |       |
|-----------------------|----------------|---------------------------|-------|
| Effect                | Point Estimate | 95% Wald Confidence Limit |       |
| Nauseas 1 vs 0        | 1.774          | 1.168                     | 2.693 |
| ca 1 vs 0             | 2.335          | 1.481                     | 3.682 |
| ca 2 vs 0             | 1.689          | 0.690                     | 4.132 |
| po 1 vs 0             | 1.816          | 1.102                     | 2.992 |
| po 2 vs 0             | 0.785          | 0.390                     | 1.579 |
| c_DB 1 vs 0           | 2.682          | 1.823                     | 3.947 |
| rx10_calcium 1 vs 0   | 1.641          | 1.118                     | 2.408 |
| rx17_corticoid 1 vs 0 | 2.202          | 1.301                     | 3.725 |



## Final stepwise logistic model – Hypermagnesemia

Factors entered in model: c\_PAD, c\_COPD, c\_DB, c\_NEO, c\_ENDO, c\_stroke, CKD, rx1\_furosem, rx3\_otherdiur, rx10\_calcium, rx11\_othermineral, rx12\_vitD, rx14\_laxative, rx19\_phosbind, poor\_peripheral\_perfusion, Seizure, Altered\_mental\_status, HF, inc\_WOB, Ca, Sex,

| Response Profile |    |                 |
|------------------|----|-----------------|
| Ordered Value    | mg | Total Frequency |
| 1                | 2  | 48              |
| 2                | 0  | 678             |

*Probability modeled is mg='2'.*

| Type 3 Analysis of Effects |    |                 |            |
|----------------------------|----|-----------------|------------|
| Effect                     | DF | Wald Chi-Square | Pr > ChiSq |
| CKD                        | 1  | 12.8094         | 0.0003     |
| ca                         | 2  | 9.0003          | 0.0111     |
| rx1_furosem                | 1  | 7.7259          | 0.0054     |
| poor_peripheral_perfusion  | 1  | 8.4509          | 0.0036     |
| po1                        | 1  | 25.3747         | <.0001     |

| Odds Ratio Estimates             |  |                |                            |        |
|----------------------------------|--|----------------|----------------------------|--------|
| Effect                           |  | Point Estimate | 95% Wald Confidence Limits |        |
| CKD 1 vs 0                       |  | 3.771          | 1.823                      | 7.802  |
| ca 1 vs 0                        |  | 0.153          | 0.043                      | 0.543  |
| ca 2 vs 0                        |  | 1.488          | 0.355                      | 6.235  |
| rx1_furosem 1 vs 0               |  | 2.993          | 1.382                      | 6.483  |
| poor_peripheral_perfusion 1 vs 0 |  | 4.012          | 1.572                      | 10.234 |
| po1                              |  | 3.683          | 2.218                      | 6.117  |

## Final stepwise logistic model – Hypophosphatemia

Factors entered in model: c\_CAD, c\_PAD, c\_COPD, c\_HEPmild, c\_DB, c\_NEO, c\_ENDO, rx1\_furosem, rx5\_PPI, rx15\_chimio, Weakness, Seizure, Abdominal\_pain, poor\_peripheral\_perfusion, HF, Ca, Mg, Sex, Age\_yr

| Response Profile |    |                 |
|------------------|----|-----------------|
| Ordered Value    | po | Total Frequency |
| 1                | 1  | 109             |
| 2                | 0  | 738             |

*Probability modeled is po='1'.*

| Type 3 Analysis of Effects |    |                 |            |
|----------------------------|----|-----------------|------------|
| Effect                     | DF | Wald Chi-Square | Pr > ChiSq |
| Seizure                    | 1  | 12.3996         | 0.0004     |
| ca                         | 2  | 13.8826         | 0.0010     |
| mg                         | 2  | 9.7105          | 0.0078     |
| sex                        | 1  | 5.8349          | 0.0157     |

| Odds Ratio Estimates |        |                |                            |       |
|----------------------|--------|----------------|----------------------------|-------|
| Effect               |        | Point Estimate | 95% Wald Confidence Limits |       |
| Seizure              | 1 vs 0 | 3.991          | 1.847                      | 8.623 |
| ca                   | 1 vs 0 | 2.534          | 1.510                      | 4.250 |
| ca                   | 2 vs 0 | 2.303          | 0.831                      | 6.381 |
| mg                   | 1 vs 0 | 1.966          | 1.205                      | 3.206 |
| mg                   | 2 vs 0 | 0.232          | 0.031                      | 1.761 |
| sex                  | 1 vs 0 | 0.594          | 0.389                      | 0.906 |

## Final stepwise logistic model – Hyperphosphatemia

Factors entered in model: c\_CAD, c\_PAD, c\_COPD, c\_DB, c\_ENDO, c\_stroke, CKD, rx1\_furosem, rx3\_otherdiur, rx5\_PPI, rx10\_calcium, rx11\_oothermineral, rx12\_vitD, rx19\_phosbind, Weakness, Seizure, Abdominal\_pain, Altered\_mental\_status, poor\_peripheral\_perfusion, HF, inc\_WOB, Nauseas, Palpitations, Paresthesias, Ca, Mg, Sex, Age\_yr

| Response Profile |    |                 |
|------------------|----|-----------------|
| Ordered Value    | po | Total Frequency |
| 1                | 2  | 80              |
| 2                | 0  | 690             |

*Probability modeled is po='2'.*

| Type 3 Analysis of Effects |    |                 |            |
|----------------------------|----|-----------------|------------|
| Effect                     | DF | Wald Chi-Square | Pr > ChiSq |
| Abdominal_pain             | 1  | 4.5367          | 0.0332     |
| ca                         | 2  | 12.6984         | 0.0017     |
| mg                         | 2  | 15.8151         | 0.0004     |
| c_PAD                      | 1  | 4.9505          | 0.0261     |
| CKD                        | 1  | 20.1999         | <.0001     |
| rx19_phosbind              | 1  | 6.5318          | 0.0106     |
| Age_yr                     | 1  | 9.4269          | 0.0021     |

| Odds Ratio Estimates  |                |                            |        |
|-----------------------|----------------|----------------------------|--------|
| Effect                | Point Estimate | 95% Wald Confidence Limits |        |
| Abdominal_pain 1 vs 0 | 1.897          | 1.052                      | 3.419  |
| ca 1 vs 0             | 2.386          | 1.247                      | 4.567  |
| ca 2 vs 0             | 4.185          | 1.533                      | 11.425 |
| mg 1 vs 0             | 1.008          | 0.486                      | 2.093  |
| mg 2 vs 0             | 4.477          | 2.117                      | 9.464  |
| c_PAD 1 vs 0          | 2.249          | 1.101                      | 4.593  |
| CKD 1 vs 0            | 4.124          | 2.223                      | 7.651  |
| rx19_phosbind 1 vs 0  | 4.788          | 1.441                      | 15.912 |
| Age_yr                | 0.977          | 0.963                      | 0.992  |

SUPPLEMENTARY FILE A4

LOGISTIC REGRESSION MODEL FOR RISK FACTORS OF THERAPEUTIC INTERVENTION FOR ANY CALCIUM, MAGNESIUM OR PHOSPHORUS ABNORMALITY

**Final stepwise logistic model**

Factors entered in model: c\_PAD, c\_COPD, c\_DB, c\_MET, CKD, rx3\_otherdiur, rx10\_calcium, rx12\_vitD, rx19\_phosbind, rx20\_calcimim, Anorexia, Altered\_mental\_status, Nauseas, poor\_peripheral\_perfusion, Abdominal\_pain, ECG3\_NEW, sex, Age\_yr,

| Response Profile |          |                 |
|------------------|----------|-----------------|
| Ordered Value    | Tx_Dicho | Total Frequency |
| 1                | 1        | 84              |
| 2                | 0        | 855             |

*Probability modeled is Tx\_Dicho=1.*

| Type 3 Analysis of Effects |    |                 |            |
|----------------------------|----|-----------------|------------|
| Effect                     | DF | Wald Chi-Square | Pr > ChiSq |
| Age_yr                     | 1  | 7.6377          | 0.0057     |
| Nauseas                    | 1  | 5.9702          | 0.0145     |
| c_COPD                     | 1  | 5.1889          | 0.0227     |
| rx10_calcium               | 1  | 13.5125         | 0.0002     |
| poor_peripheral_perfusion  | 1  | 7.5446          | 0.0060     |
| ECG3_NEW                   | 2  | 12.1006         | 0.0024     |
| rx20_calcimim              | 1  | 6.8256          | 0.0090     |

| Odds Ratio Estimates             |                |                            |        |
|----------------------------------|----------------|----------------------------|--------|
| Effect                           | Point Estimate | 95% Wald Confidence Limits |        |
| Age_yr                           | 0.981          | 0.968                      | 0.995  |
| Nauseas 1 vs 0                   | 1.915          | 1.137                      | 3.224  |
| c_COPD 1 vs 0                    | 1.998          | 1.101                      | 3.624  |
| rx10_calcium 1 vs 0              | 2.656          | 1.578                      | 4.470  |
| poor_peripheral_perfusion 1 vs 0 | 2.542          | 1.306                      | 4.946  |
| ECG3_NEW 1 vs 0                  | 2.020          | 1.007                      | 4.052  |
| ECG3_NEW UNKNOWN vs 0            | 0.520          | 0.291                      | 0.929  |
| rx20_calcimim 1 vs 0             | 10.826         | 1.813                      | 64.644 |
